# Supplementary material for: CdSe/ZnS quantum dot-encoded maleic anhydride-grafted PLA microspheres prepared through membrane emulsification for multiplexed immunoassays of tumor markers
Source: Royal Society of Chemistry journal article supplement (doi:10.1039/d2an00350c), 2022-01-01
Supplement: d2an00350c1.pdf [file d2an00350c1.pdf]

*Supporting Information*

**CdSe/ZnS quantum dot-encoded maleic anhydride-grafted PLA microspheres prepared through membrane emulsification for multiplexed immunoassays of tumor markers**

Wan-Sheng Tang<sup>a</sup>, Bo Zhang<sup>a</sup>, Lai-Di Xu<sup>a</sup>, Ning Bao<sup>b</sup>, Qing Zhang<sup>c</sup>, Shou-Nian Ding<sup>a\*</sup>

<sup>a</sup>Jiangsu Province Hi-Tech Key Laboratory for Bio-medical Research, School of Chemistry and Chemical Engineering, Southeast University, Nanjing 211189, China

<sup>b</sup>School of Public Health, Nantong University, 226019 Nantong, Jiangsu, China

<sup>c</sup>Chinese Academy of Inspection and Quarantine, Beijing, China

\*Corresponding authors. (S.-N. Ding) Fax: (+86) 25-52090621.

E-mail: [snding@seu.edu.cn](mailto:snding@seu.edu.cn)

## CONTENTS

| <b>Section</b>                                                                      | <b>Page</b> |
|-------------------------------------------------------------------------------------|-------------|
| <b>Experimental part</b>                                                            |             |
| Reagents and chemicals                                                              | 3           |
| Recipes of buffers for immunoassays                                                 | 3           |
| Table.S1. Buffers formulations for immunoassays                                     | 3           |
| Preparation of polylactic acid-maleic anhydride (PLA-MA)                            | 4           |
| Scheme S1. Schematic diagram of the preparation of polylactic acid-maleic anhydride | 4           |
| Synthesis of CdSe/ZnS QDs                                                           | 4           |
| Synthesis of CdTe QDs                                                               | 5           |
| Immunodetection of tumor markers                                                    | 5           |
| <b>Results and discussion</b>                                                       |             |
| Fig. S1. Characterization of PLA-MA                                                 | 7           |
| Fig. S2. Spectral characterization of PLA-MA                                        | 8           |
| Fig. S3. Optical microscope image of PLA-MA microspheres                            | 9           |
| Fig. S4. Fluorescence stability of PLA-MA                                           | 10          |
| Fig. S5. Fluorescence Spectra of PLA-MA Fluorescent Microspheres                    | 11          |
| Fig. S6. FT-IR spectra of QDs in each experimental process                          | 12          |
| Table.S2. LOD of four tumor markers                                                 | 13          |
| <b>Reference</b>                                                                    | 13          |

## Reagents and chemicals

Cadmium oxide (CdO, 99.5%), zinc acetate (99.9%), selenium powder (Se, 99.9%), sulfur powder (S, 99.99%), oleic acid (OA, 90%), Thimerosal, 1-octadecene (ODE, 90%), trioctylphosphine (TOP, 97%), Tellurium (Te, 99.9%), sodium borohydride (NaBH<sub>4</sub>, ≥96%), cadmium chloride (CdCl<sub>2</sub>•2.5H<sub>2</sub>O, 99.0%), sodium hydroxide (NaOH, ≥96%), sodium dihydrogen phosphate dihydrate (NaH<sub>2</sub>PO<sub>4</sub>•2H<sub>2</sub>O, ≥99%) and disodium hydrogen phosphate dodecahydrate (Na<sub>2</sub>HPO<sub>4</sub>•12H<sub>2</sub>O, ≥99%) were provided from Sinopharm Chemical Reagent Co., Ltd. Phosphate buffer saline (PBS, 0.1 M, pH =7.4), phosphate buffer saline tween-20 (PBST, 0.05% tween-20 in the PBS) were self-prepared. Double distilled water was used throughout the experiment. All reagents were purified without further purification.

## Recipes of buffers for immunoassays

**Table S1.** Buffers formulations for immunoassays

| Name of buffer    | Component                                                    | PH  | Storage                                                        |
|-------------------|--------------------------------------------------------------|-----|----------------------------------------------------------------|
| PBS               | 0.7260g Na <sub>2</sub> HPO <sub>4</sub> •12H <sub>2</sub> O | 7.4 |                                                                |
|                   | 1.6146g NaCl                                                 |     |                                                                |
|                   | 0.0480g KH <sub>2</sub> PO <sub>4</sub>                      |     |                                                                |
|                   | 0.0403g KCl                                                  |     |                                                                |
|                   | 200mL H <sub>2</sub> O                                       |     |                                                                |
| Washing Buffer    | 20mL PBS                                                     | 7.4 | Filter<br>Sterilize and<br>store at 4 °C<br>for all<br>Buffers |
|                   | 10μL Tween-20                                                |     |                                                                |
|                   | 0.6000g NaH <sub>2</sub> PO <sub>4</sub>                     |     |                                                                |
| Activation Buffer | 0.4mL 0.2g/mL NaOH                                           | 6.2 |                                                                |
|                   | 50mL H <sub>2</sub> O                                        |     |                                                                |
|                   | 20mL PBS                                                     |     |                                                                |
| Storage Buffer    | 4μL Tween-20                                                 | 7.4 |                                                                |
|                   | 0.0200g BSA                                                  |     |                                                                |
|                   | 0.0040g Thimerosal                                           |     |                                                                |
| Assay Buffer      | 20mL PBS                                                     | 7.4 |                                                                |
|                   | 0.0200g BSA                                                  |     |                                                                |



Dissolve and purify with chloroform and acetone several times, and finally store in chloroform for later use. For the synthesis of yellow light-emitting QDs (580 nm), except that the amounts of Se and S are changed to 0.3 mmol and 4.1 mmol, respectively, the rest of the process is the same as the synthesis of green light-emitting quantum dots.

### **Synthesis of water-soluble CdTe QDs**

The water-phase CdTe QDs protected by MPA were synthesized by hydrothermal method. 67  $\mu\text{L}$  MPA and 91.3 mg CdTe  $\cdot 2.5\text{H}_2\text{O}$  were mixed in 40 mL of water, and the pH of the solution was adjusted to 11.0 with 1 M NaOH solution with stirring. At this time, in a nitrogen atmosphere, NaHTe is obtained by the reduction reaction of Te powder and  $\text{NaBH}_4$ , and 1 mL of NaHTe solution (0.04 M) is transferred with a syringe, and the above-mentioned cadmium source solution is injected. Then the reaction mixture was heated to reflux (100  $^\circ\text{C}$ ) under normal pressure, and a condenser was attached. By controlling the heating time, CdTe crystal nuclei with different crystal nucleus diameters are obtained, and a small amount of reaction solution is continuously taken out and placed under ultraviolet light for observation. After the fluorescence emission of the desired particle size is obtained, the reaction is stopped, the reaction solution is separated with ethanol, and centrifuged at 10,000 rpm for 10 minutes, repeated 3 times. Naturally dry, keep at 4  $^\circ\text{C}$  and avoid light.

### **Immunodetection of tumor markers**

In this paper, four tumor markers of CA125, CA199, CA724, CEA were selected for immunoassay experiments. The experimental program is shown in Fig 3. First, take a certain amount of PLA-MA microsphere suspension, add 20 microliters of solutions containing 70 mg/mL EDC and 70 mg/mL S-NHS respectively, and react at room temperature for 30 minutes in the dark to activate the microspheres. The activated microspheres were fully dispersed and suspended in PBS buffer, and appropriate amount of corresponding capture antibody was added to incubate at room

temperature and avoid light for 3 h to coat antibody X-Ab1 (X=CA125, CA199, CA724, CEA). Then, 1wt% BSA was added to the antibody-coated microspheres and reacted at room temperature for 30 minutes to block the unreacted active ester groups on the surface of the microspheres. Wash and centrifuge several times after each operation. Secondly, a certain amount of secondary antibody (X-Ab2), 10  $\mu$ L EDC solution (10 mg/mL), 500  $\mu$ L CdTe QDs (660 nm, 2 mg/mL) were mixed uniformly, and the reaction was shaken for 3h in the dark. Then, 1wt% BSA was added to the reaction with shaking at room temperature to block the unreacted active sites on the surface of the CdTe QDs, labeled X-Ab2-CdTe QDs. Then, 150  $\mu$ L of buffer solutions containing different concentrations of tumor marker antigen (X-Ag) were separately mixed with PLA-MA microspheres with specific antibodies and incubated for 1 h at room temperature in the dark. Wash and centrifuge several times to remove unreacted antigen. Immediately, a certain amount of X-Ab2-CdTe QDs was added to the above system and reacted at room temperature and protected from light for 1 h to construct a sandwich immune structure, and then washed and centrifuged several times. Finally, the PLA-MA quantum dot microspheres with a sandwich immune structure on the surface were reconstituted into 200  $\mu$ L suspension, and transferred to a flow cytometer for flow cytometry analysis.

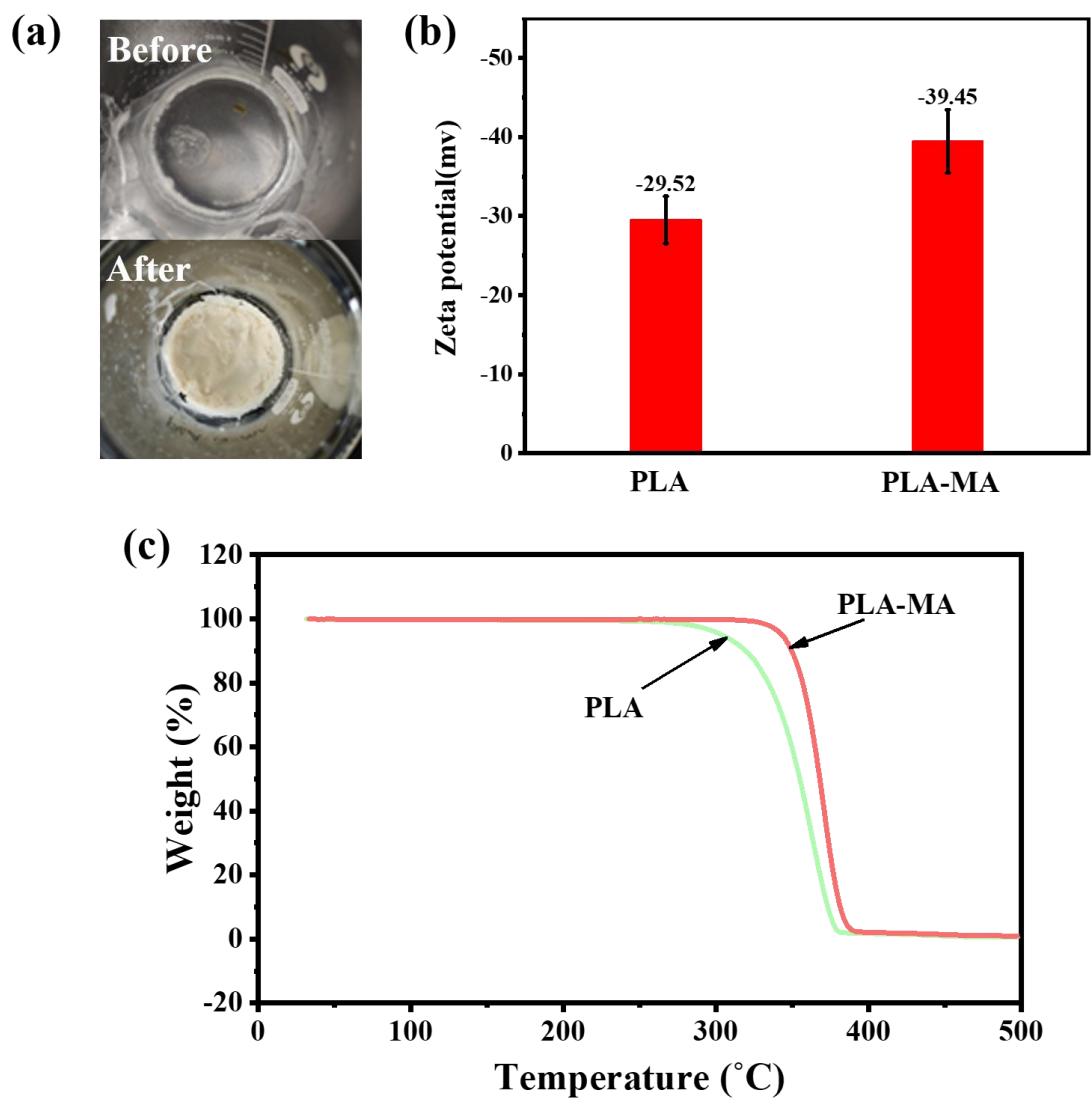

**Fig. S1** (a) The morphology of PLA-MA before and after the reaction; (b) the zeta potential of PLA and PLA-MA; (c) the thermogravimetric analysis of PLA-MA.

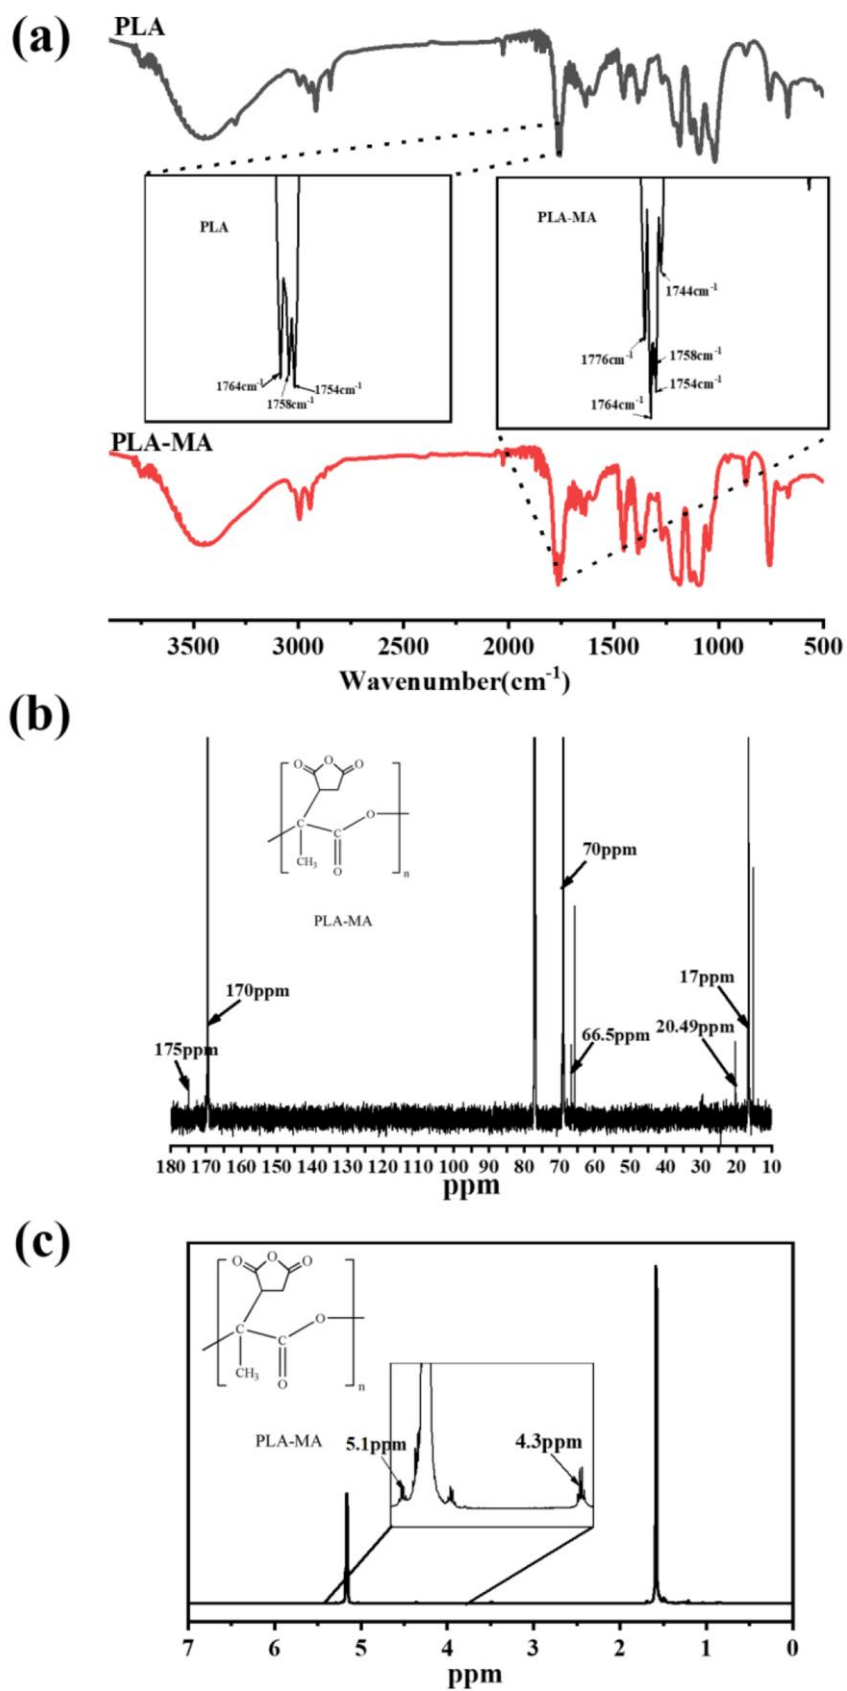

**Fig. S2** (a) Fourier transform infrared spectra of PLA and PLA-MA; (b)  $^{13}\text{C}$ -NMR spectrum of PLA-MA; (c)  $^1\text{H}$ -NMR spectrum of PLA-MA



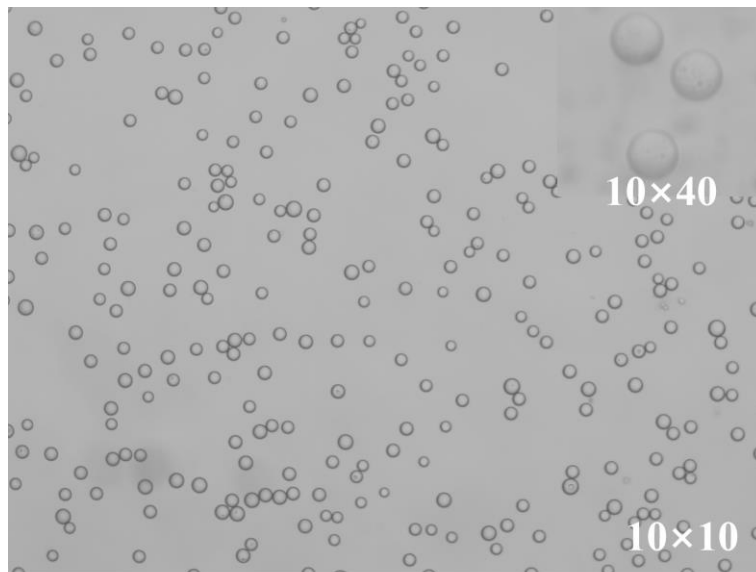

**Fig. S3** Optical microscope image of PLA-MA microspheres

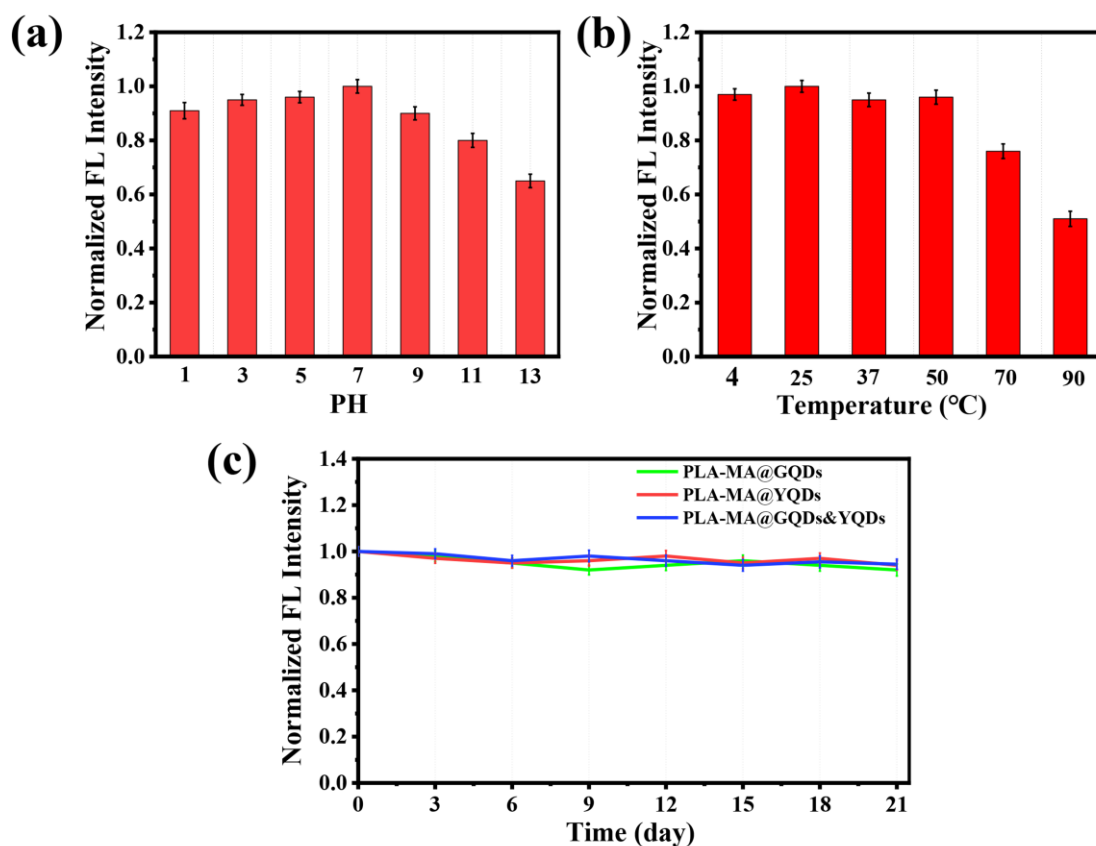

**Fig. S4** Fluorescence stability of PLA-MA Fluorescent Microspheres. (a) Temperature dependent stability: PLA-MA fluorescent microspheres were suspended in PBS (pH=7.4) and stored at different temperatures including 4 °C, 25 °C, 37 °C, 50 °C, 70 °C and 90 °C for 24 h. (b) pH-dependent stability: PLA-MA Fluorescent Microspheres were suspended in PBS with different pH values (1, 3, 5, 7, 9, 11, and 13, respectively) and stored at room temperature for 24 h. (c) Time dependent stability: PLA-MA fluorescent microspheres were kept at room temperature for 21 days.

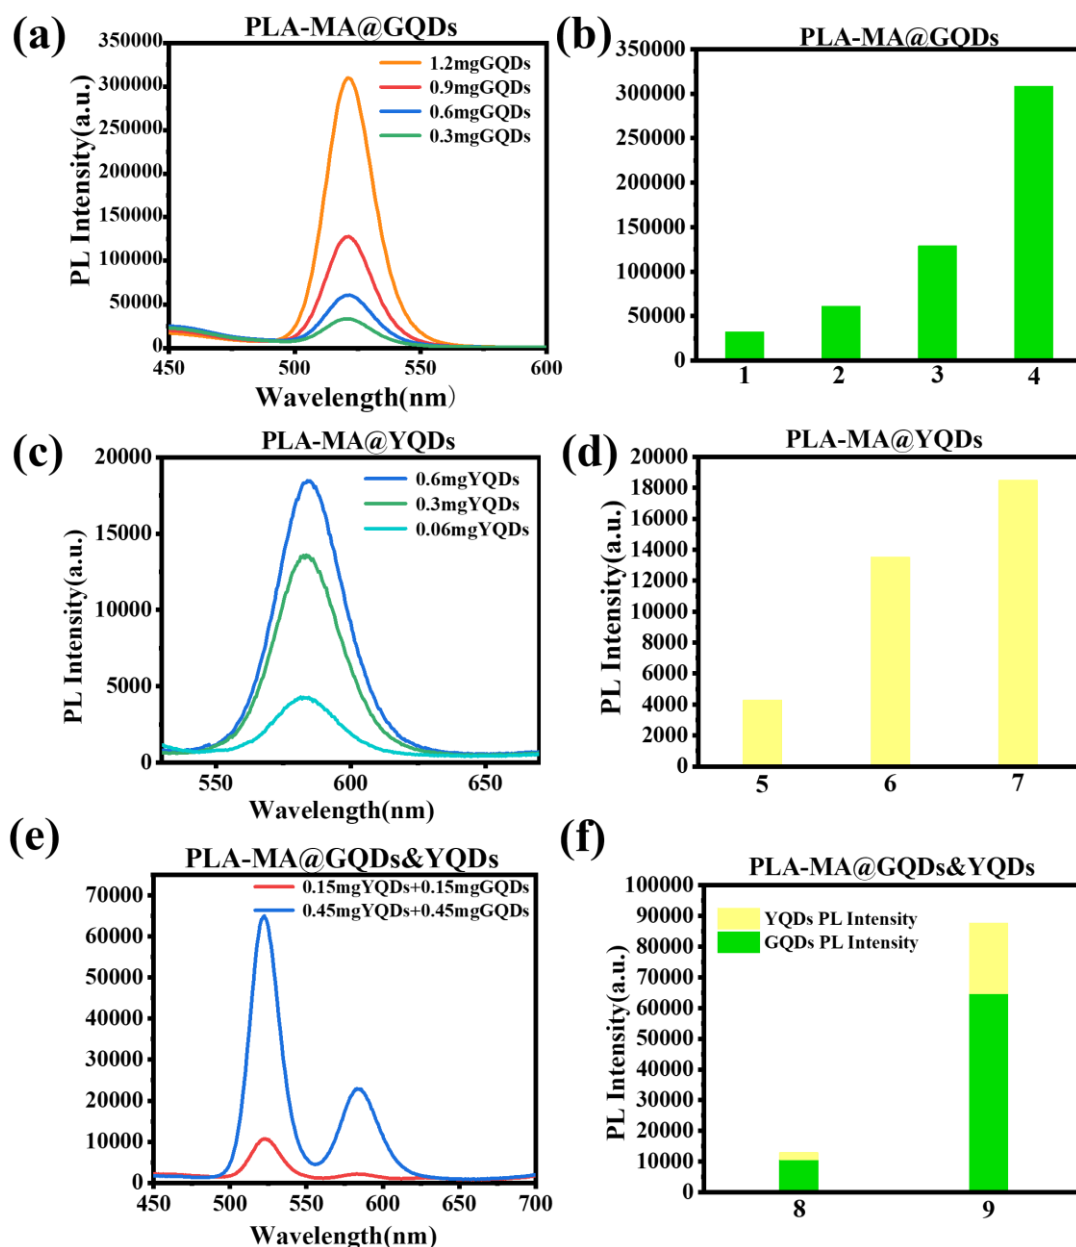

**Fig. S5** Fluorescence spectra of PLA-MA fluorescent microspheres. (a) The fluorescence spectrum of PLA-MA@GQDs; (b) The maximum fluorescence intensity of PLA-MA@YQDs; (c) The fluorescence spectrum of PLA-MA@YQDs; (d) The maximum fluorescence intensity of PLA-MA@YQDs; (e) Fluorescence spectra of PLA-MA@GQDs&YQDs; (f) maximum fluorescence intensity of PLA-MA@GQDs&YQDs.

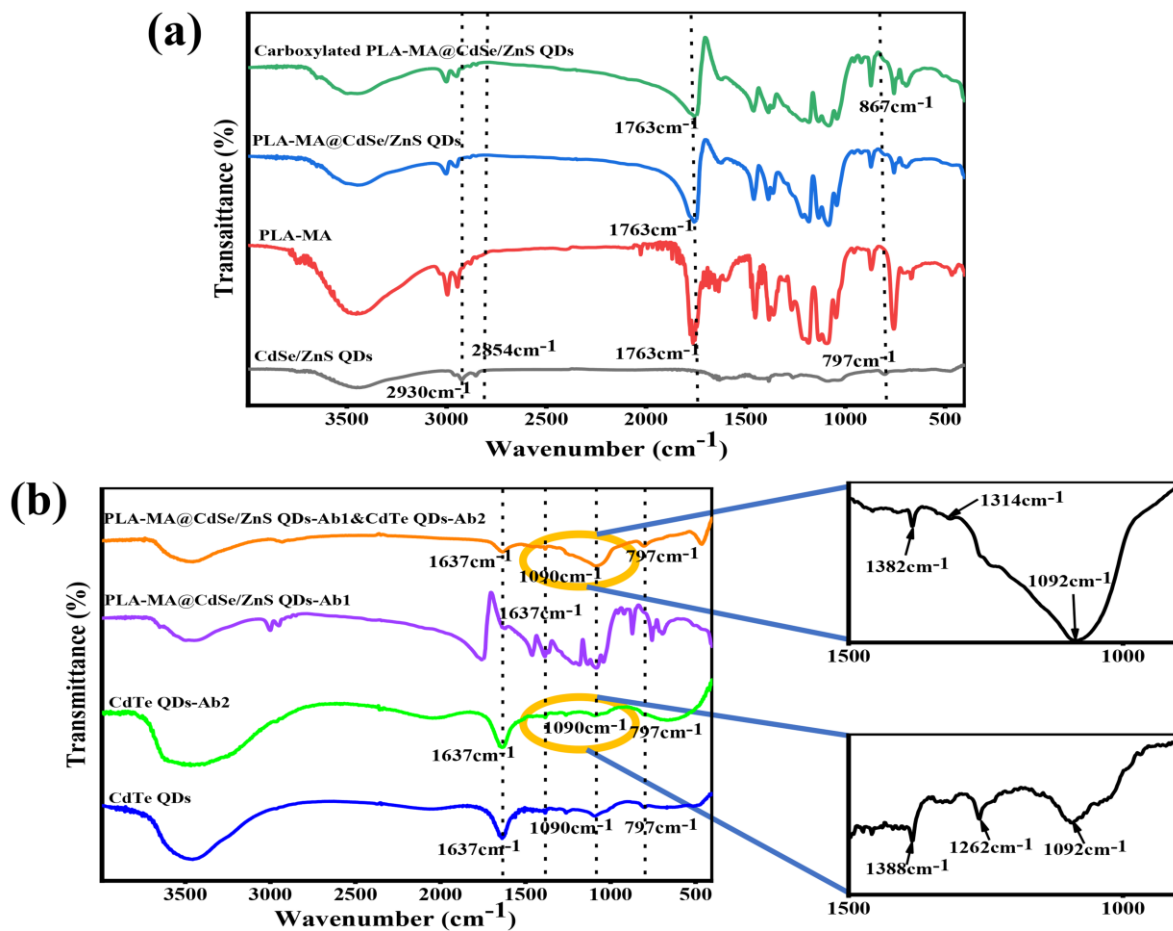

**Fig. S6** FT-IR spectra of QDs in each experimental process: (a) FT-IR spectra of CdSe/ZnS QDs in various stages of tumor marker immunodetection experiments; (b) FT-IR spectra of CdTe QDs at various stages of the tumor marker immunodetection experiment.

**Table S2.** The relationship between the detection limit and the dosage of primary antibody in single factor detection of four tumor markers.

| Coating           | LOD       |            |           |            |
|-------------------|-----------|------------|-----------|------------|
|                   | CA125     | CA199      | CA724     | CEA        |
| 2.5 $\mu\text{g}$ | 2.2 KU/L  | 4.2 KU/L   | 2.13 KU/L | 0.322 KU/L |
| 5 $\mu\text{g}$   | 1.81 KU/L | 0.923 KU/L | 1.64 KU/L | 0.138 KU/L |
| 10 $\mu\text{g}$  | 1.62 KU/L | 0.920 KU/L | 1.06 KU/L | 0.132 KU/L |

## Reference

1. Y. K. Leng, W. J. Wu, L. Li, K. Lin and K. Sun, *Adv. Funct. Mater.*, 2016, **26**, 7581–7589.
2. D. Muenprasat, S. Suttireungwong and C. Tongpin, *J. Met. Mater. Miner.*, 2010, **20**, 189-192.
3. D. Plackett, *J Polym Environ*, 2004, **12**, 131-138.
4. J. Cho, Y. K. Jung, J. K. Lee, *J. Mater. Chem.*, 2012, **22**, 10827-10833.
5. L. Zou, Z. Y. Gu, N. Zhang, Y. L. Zhang, Z. Fang, W. H. Zhu and X. H. Zhong, *J. Mater. Chem.*, 2008, **18**, 2807-2815.
6. N. Gaponik, D. V. Talapin, A. L. Rogach, K. Hoppe, E. V. Shevchenko, A. Kornowski, A. Eychmuller and H. Weller, *J. Phys. Chem. B*, 2002, **106**, 7177-7185.
